# Supplementary material
Source: publisher figshare collection journal article supplement (https://rs.figshare.com/ndownloader/files/16430384)
Supplement: Supplementary file 1 [file 16430384]

#NEXUS
[written Fri Jul 05 14:58:21 EDT 2019 by Mesquite  version 3.6 (build 917)]

BEGIN TAXA;
	
	DIMENSIONS NTAX=34;
	TAXLABELS
		Hallucigenia Ovatiovermis Aysheaia Megadictyon Jianshanopodia Siberion Kerygmachela Pambdelurion Opabinia Cambroraster Hurdia Peytoia Schinderhannes Aegirocassis Stanleycaris Pahvantia Zhenghecaris Laminacaris Ramskoeldia Amplectobelua_symbrachiata Amplectobelua_stephenensis Lyrarapax Anomalocaris_saron Anomalocaris_canadensis Anomalocaris_briggsi Tamisiocaris Caryosyntrips Surusicaris Isoxys Yawunik Eoredlichia Habelia Waptia Chengjiangocaris 
	;

END;


BEGIN CHARACTERS;
	
	DIMENSIONS  NCHAR=72;
	FORMAT DATATYPE = STANDARD GAP = - MISSING = ? SYMBOLS = "  0 1 2 3 4";
	MATRIX
	Hallucigenia                0--00-000-00---0010-?-0-------0-------------------------0--010------0--0
	Ovatiovermis                0--?0-100-00---0010-?-0-------0-0---10??10---0--------0-0-1010----0-0--0
	Aysheaia                    0--00-100-00---00????-0-------1-0---????00---0--------0-0-1000----0-0--0
	Megadictyon                 0--10-100-00---00????-0-------1?0---????00---0-?------0-0-?000----0-?--?
	Jianshanopodia              0--10-100-00---00????-0-------100---?????0---???????????0-1000----0-?--0
	Siberion                    0--?0-100-0????00????-0-------110---????????????????????0-?000-?--??0--?
	Kerygmachela                0--1??100-01000?0????-0-------110---?-??00---0--------0-0-?0010100??0--1
	Pambdelurion                0--1??100-0?????010-?-0-------110---10??00---0--------0-0-?0010?0???????
	Opabinia                    10-1??100-0111020????-0-------10?---?-??-0---0--------?-?-00?10200111100
	Cambroraster                101?0-110-011011011101111111111010100-1001010110-311110-0000-1101?101100
	Hurdia                      100?0-110-011011011101111101011010100-1001011110-211110-0000-110??101000
	Peytoia                     1001??110-01101101110011101?01101000111001011110-31110110000-11111101?00
	Schinderhannes              1?0?0-110-01?00101???0?10?1?0?10????110?01010110-211?0??00?0-??1????1001
	Aegirocassis                10??1011?-0???????????1110000010?0????1001010110-3110-0-?00?-1???11?????
	Stanleycaris                ??????11????????01110?????????1?1000111001010110-?11???-?0??????????????
	Pahvantia                   ??0???????????????????11100101??????????????????????????????????????????
	Zhenghecaris                ??1???????????????????11111111??????????????????????????????????????????
	Laminacaris                 ??????11??????????????????????1?1100??001100-111021(0 1)1010?0??????????????
	Ramskoeldia                 ??????11??????????????????????1?01-1??0110---1110100-010?0??-1???1??????
	Amplectobelua_symbrachiata  100?0-110-?1100?0???1?1100100010110110011100-1010000-011000?-1?111??1?10
	Amplectobelua_stephenensis  ??????11??????????????????????1?110?1001?110-100-100-011?0??????????????
	Lyrarapax                   10010-110-1110010??1??1100100?1011010-011100-1110200-0??0000-11?111?1-10
	Anomalocaris_saron          10010-11?-1110010110??1?00100?1001-1??0000---11?01?0?0100000-11111??1110
	Anomalocaris_canadensis     10010-110-111001011010110010001001-0100010---11100-0-0100000-112101?1100
	Anomalocaris_briggsi        ??????11??????????????????????1?01-110?0011-011112(0 1)00010?0??????????????
	Tamisiocaris                ??????11??????????????????????1?01-?1000011-01111310?0???0??????????????
	Caryosyntrips               ??????11??????????????????????1?01-0100100---0--------1??0??????????????
	Surusicaris                 1?0?11111101100??0----?0?????-1000-00-0000---0--------10?00000----0-????
	Isoxys                      1?01??111101100??0----100??00-100(0 1)-00-0000---0--------0-?0?0?0----??1100
	Yawunik                     1111111110-11102?0----00------10?????????????????????????110-0----110--1
	Eoredlichia                 1111111110-1000210----00------10????????????????????????1111-0----110--0
	Habelia                     11101(0 1)1110-1000210----00------10?????????????????????????111-0----110--1
	Waptia                      1100111111-11002?0----100?000-10????????????????????????1110-0----110--1
	Chengjiangocaris            111?111111-1100210----1000100-10????????????????????????111?-0----0-?--1

;

END;
BEGIN MRBAYES;
SET autoclose = yes nowarn = yes;
LOG START filename = Cambroraster11.output;
CHARSET Neomorphic = 2 3 4 6 7 8 9 11 12 17 18 19 22 23 24 26 28 29 31 32 33 35 36 37 41 42 46 48 53 55 57 58 59 60 62 63 67 69 71 72;
CHARSET Transformational = 1 5 10 13 14 15 16 20 21 25 27 30 34 38 39 40 43 44 45 47 49 50 51 52 54 56 61 64 65 66 68 70;
partition chartype = 2 : Neomorphic , Transformational;
set partition = chartype;
LSET applyto = ( all ) rates = equal coding = variable;
PRSET applyto = ( all ) symdirihyperpr = fixed ( infinity ) ratepr = variable;
OUTGROUP Hallucigenia;
MCMCP temp = 0.1 samplefreq = 1000 printfr = 1000 nruns = 4 nchain = 4 starttree = random relburnin = yes burninfrac = 0.20;
MCMCP savebrlens = yes filename = Cambroraster11;
SHOWMOVES;
MCMC ngen = 3000000;
SUMT filename = Cambroraster11 contype = halfcompat relburnin = yes burninfrac = 0.20;
SUMP filename = Cambroraster11 relburnin = yes burninfrac = 0.20;

END;
BEGIN ASSUMPTIONS;
	TYPESET * UNTITLED   =  unord:  1- 72;

END;

BEGIN MESQUITECHARMODELS;
	ProbModelSet * UNTITLED   =  'Mk1 (est.)':  1- 72;
END;

Begin MESQUITE;
		MESQUITESCRIPTVERSION 2;
		TITLE AUTO;
		tell ProjectCoordinator;
		timeSaved 1562353101483;
		getEmployee #mesquite.minimal.ManageTaxa.ManageTaxa;
		tell It;
			setID 0 5463361111631016116;
			tell It;
				setDefaultOrder  2 7 0 3 4 5 7 8 9 10 12 13 14 18 20 15 16 20 21 22 23 24 25 28 29 26 29 30 35 36 37 31 32 36;
				attachments ;
			endTell;
		endTell;
		getEmployee #mesquite.charMatrices.ManageCharacters.ManageCharacters;
		tell It;
			setID 0 7371595158199747121;
			tell It;
				setDefaultOrder  0 2 7 50 16 4 83 49 24 40 42 9 10 12 13 96 17 96 100 97 101 83 50 55 56 25 56 57 28 31 18 19 32 56 57 60 63 68 73 69 73 83 64 83 84 81 82 68 83 87 85 86 87 73 88 89 60 44 81 64 21 23 40 7 33 28 32 33 37 39 40 41;
				attachments ;
			endTell;
			mqVersion 360;
			checksumv 0 3 2463935603 null  getNumChars 72 numChars 72 getNumTaxa 34 numTaxa 34   short true   bits 15   states 15   sumSquaresStatesOnly 3160.0 sumSquares 3160.0 longCompressibleToShort false usingShortMatrix true   NumFiles 1 NumMatrices 1;
			mqVersion;
		endTell;
		getWindow;
		tell It;
			suppress;
			setResourcesState false false 100;
			setPopoutState 300;
			setExplanationSize 0;
			setAnnotationSize 0;
			setFontIncAnnot 0;
			setFontIncExp 0;
			setSize 2141 1036;
			setLocation -8 0;
			setFont SanSerif;
			setFontSize 10;
			getToolPalette;
			tell It;
			endTell;
			desuppress;
		endTell;
		getEmployee  #mesquite.charMatrices.BasicDataWindowCoord.BasicDataWindowCoord;
		tell It;
			showDataWindow #7371595158199747121 #mesquite.charMatrices.BasicDataWindowMaker.BasicDataWindowMaker;
			tell It;
				getWindow;
				tell It;
					getTable;
					tell It;
						rowNamesWidth 182;
					endTell;
					setExplanationSize 30;
					setAnnotationSize 20;
					setFontIncAnnot 0;
					setFontIncExp 0;
					setSize 2041 964;
					setLocation -8 0;
					setFont SanSerif;
					setFontSize 10;
					getToolPalette;
					tell It;
						setTool mesquite.charMatrices.BasicDataWindowMaker.BasicDataWindow.ibeam;
					endTell;
					setActive;
					setTool mesquite.charMatrices.BasicDataWindowMaker.BasicDataWindow.ibeam;
					colorCells  #mesquite.charMatrices.ColorCells.ColorCells;
				tell It;
					setColor Dark Gray;
					removeColor on;
				endTell;
					colorRowNames  #mesquite.charMatrices.TaxonGroupColor.TaxonGroupColor;
					colorColumnNames  #mesquite.charMatrices.CharGroupColor.CharGroupColor;
					colorText  #mesquite.charMatrices.NoColor.NoColor;
					setBackground White;
					toggleShowNames on;
					toggleShowTaxonNames on;
					toggleTight off;
					toggleThinRows off;
					toggleShowChanges on;
					toggleSeparateLines off;
					toggleShowStates on;
					toggleAutoWCharNames on;
					toggleAutoTaxonNames off;
					toggleShowDefaultCharNames off;
					toggleConstrainCW on;
					toggleBirdsEye off;
					toggleShowPaleGrid off;
					toggleShowPaleCellColors off;
					toggleShowPaleExcluded off;
					togglePaleInapplicable on;
					togglePaleMissing off;
					toggleShowBoldCellText off;
					toggleAllowAutosize on;
					toggleColorsPanel off;
					toggleDiagonal on;
					setDiagonalHeight 80;
					toggleLinkedScrolling on;
					toggleScrollLinkedTables off;
				endTell;
				showWindow;
				getWindow;
				tell It;
					forceAutosize;
				endTell;
				getEmployee #mesquite.charMatrices.AlterData.AlterData;
				tell It;
					toggleBySubmenus off;
				endTell;
				getEmployee #mesquite.charMatrices.ColorByState.ColorByState;
				tell It;
					setStateLimit 9;
					toggleUniformMaximum on;
				endTell;
				getEmployee #mesquite.categ.StateNamesStrip.StateNamesStrip;
				tell It;
					showStrip off;
				endTell;
				getEmployee #mesquite.charMatrices.AnnotPanel.AnnotPanel;
				tell It;
					togglePanel off;
				endTell;
				getEmployee #mesquite.charMatrices.CharReferenceStrip.CharReferenceStrip;
				tell It;
					showStrip off;
				endTell;
				getEmployee #mesquite.charMatrices.QuickKeySelector.QuickKeySelector;
				tell It;
					autotabOff;
				endTell;
				getEmployee #mesquite.charMatrices.SelSummaryStrip.SelSummaryStrip;
				tell It;
					showStrip off;
				endTell;
				getEmployee #mesquite.categ.SmallStateNamesEditor.SmallStateNamesEditor;
				tell It;
					panelOpen true;
				endTell;
			endTell;
		endTell;
		endTell;
end;
